# Supplementary material for: Detection of SARS-CoV-2 and noroviruses in cold-chain food samples using aptamer-functionalized graphene field-effect transistors
Source: Royal Society of Chemistry journal article supplement (doi:10.1039/d4sd00248b), 2024-01-01
Supplement: d4sd00248b1.pdf [file d4sd00248b1.pdf]

## Supporting Information

### **Detection of SARS-CoV-2 and noroviruses in cold-chain food samples using aptamer-functionalized graphene field-effect transistors**

Qingliu Wu <sup>a</sup>, Songjia Luo <sup>a</sup>, Lu Wang <sup>a</sup>, Baolei Dong <sup>a</sup>, Hao Qu <sup>a, b, \*</sup>, Lei Zheng <sup>a, c</sup>

<sup>a</sup> School of Food and Biological Engineering, Hefei University of Technology, Hefei  
230009, China

<sup>b</sup> Engineering Research Center of Bioprocess, Ministry of Education, Hefei University  
of Technology, Hefei, 230009, China

<sup>c</sup> Intelligent Interconnected Systems Laboratory of Anhui Province, Hefei University  
of Technology, Hefei 230009, China

\* Corresponding author.

E-mail: quhao@hfut.edu.cn (H. Qu)

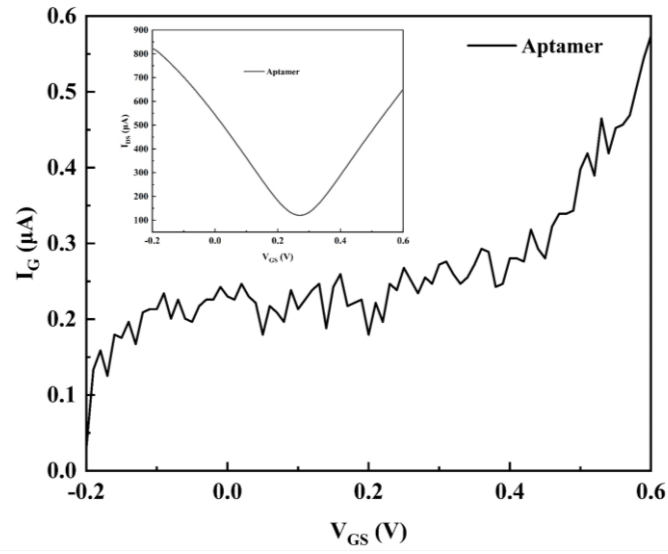

Figure S1.  $I_{DS}$  vs.  $V_{GS}$  curves and  $I_G$  vs.  $V_{GS}$  curves obtained by scanning  $V_{GS}$  in the range of -0.2 to 0.6 V, with a fixed  $V_{DS}$  of 0.05 V and a scanning rate of 0.01 V/s.

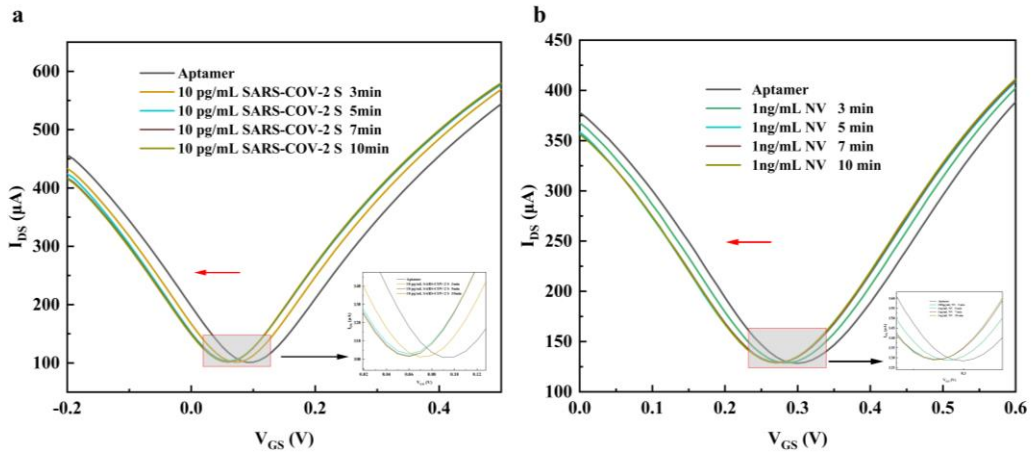

Figure S2. (a) Transfer characteristic curves of the SARS-CoV-2 GFET sensor when incubated with SARS-CoV-2 spike proteins for 3-10 min; (b) Transfer characteristic curves of norovirus GFET sensor when incubated with norovirus-like particles for 3-10 min.

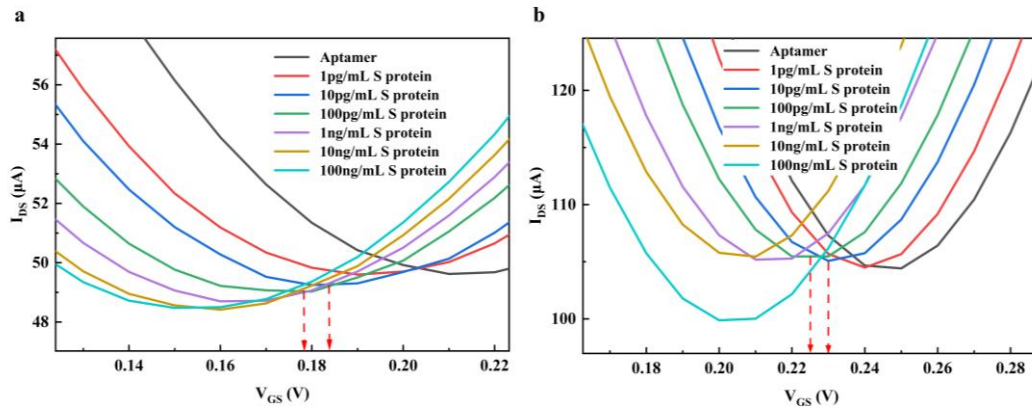

Figure S3. (a) Zoomed-in view of the transfer characteristic curves of the SARS-CoV-2 GFET at various concentrations of SARS-CoV-2 spiking proteins (diluted with  $0.1\times$  PBS). (b) Zoomed-in view of the transfer characteristic curves of the norovirus GFET at different concentrations of norovirus-like particles.

Table 1. Comparison of SARS-CoV-2 analytical performance of the SARS-CoV-2 GFET sensor with other sensitive sensors in the same field.

| Comparison of the proposed SARS-CoV-2 GFET sensor with other sensitive sensors in the same field |                      |                    |                    |            |           |
|--------------------------------------------------------------------------------------------------|----------------------|--------------------|--------------------|------------|-----------|
| Methods                                                                                          | Target               | LOD                | Linear range       | Assay time | Refs.     |
| DNA aptamer-conjugated GFET                                                                      | spike proteins       | 33 fg/mL           | 1 pg/mL-100 ng/mL  | 5 min      | this work |
| Electrochemical aptamer-based                                                                    | spike proteins       | 35.4±11.7 pM       | 760 pg/mL-76 ng/mL | 5 min      | S1        |
| DNA aptamer-conjugated GFET                                                                      | spike proteins       | 1.28 (PFU) /mL     | 100 fM-100 nM      | <20 min    | S2        |
| GO/Gr FET                                                                                        | spike proteins       | 8 fg/mL            | 10 fg/mL-100 pg/mL | 20 min     | S3        |
| (BN-GO gel) FET                                                                                  | nucleocapsid protein | 10 ag/mL           | 10 ag/mL-1 µg/mL   | 4 min      | S4        |
| Eptamer FET                                                                                      | RNA                  | 0.01 copy/µL       | 0.025-0.05 copy/µL | 5 min      | S5        |
| DNA probes PGFET                                                                                 | RNA                  | 1 fM               | 1fM-100 pM         | 20 min     | S6        |
| TDN-LG FETs                                                                                      | RNA                  | 1-2 copies /100 µL | 0.5-500 copy/µL    | 14 min     | S7        |

Table 2 Comparison of norovirus analysis performance of the Norovirus GFET sensor with other sensitive sensors in the same field.

| Comparison of the proposed norovirus GFET sensor with other sensitive sensors in the same field. |         |                 |                                   |            |           |
|--------------------------------------------------------------------------------------------------|---------|-----------------|-----------------------------------|------------|-----------|
| Methods                                                                                          | Target  | LOD             | Linear range                      | Assay time | Refs.     |
| Aptamer-conjugated GFET                                                                          | NoV VLP | 6.17 pg/mL      | 10 pg/mL-100 ng/mL                | 5 min      | this work |
| 3D electrochemical Aptasensor                                                                    | NoV VLP | 0.28 ng/mL      | 1 ng/mL-10 µg/mL                  | 30 min     | S8        |
| Electrochemical biosensor                                                                        | NoV VLP | 60 ag/mL        | 1 fg/mL-1 ng/mL                   | 5 min      | S9        |
| Aptasensor                                                                                       | NoV VLP | 100 pM          | 100 pM-3.5 nM                     | 35 min     | S10       |
| Aptasensor                                                                                       | NoV VLP | 80 ng/ml        | 0.16-10 µg/mL                     | 30 min     | S11       |
| Electrochemical biosensor                                                                        | HuNoV   | 0.003 copies/mL | 0.01–10 <sup>5</sup> copies/mL    | 2 h        | S12       |
| Electrochemical biosensor                                                                        | HuNoV   | 0.84 copy/mL    | 2.5-2.5×10 <sup>5</sup> copies/mL | 1.5 h      | S13       |
| Electrochemical biosensor                                                                        | HuNoV   | 2.37 copies/mL  | 10-10 <sup>4</sup> copies/mL      | 1 h        | S14       |

#### Supporting References

S1 A. Ldili, C. Parolo, R. Alvarez-Diduk, A. Merkoçi, Rapid and Efficient Detection of the SARS-CoV-2 Spike Protein Using an Electrochemical Aptamer-Based Sensor, ACS Sens., 2021, 6, 8, 3093–3101.

S2 D.K. Ban, T. Bodily, A.G. Karkisaval, R. Lal, Rapid self-test of unprocessed viruses of SARS-CoV-2 and its variants in saliva by portable wireless graphene biosensor, PNAS, 2022, 119, 2206521119.

S3

J. Gao, C. Wang, Y. Chu, Y. Han, Y. Gao, Y. Wang, C. Wang, H. Liu, L. Han, Y. Zhan, Graphene oxide-graphene Van der Waals heterostructure transistor biosensor for SARS-CoV-2 protein detection, Talanta, 2022, 240, 123197.

S4

I. Novodchuk, M. Kayaharman, I. Prassas, A. Soosaipillai, R. Karimi, I.A. Goldthorpe, E. Abdel-Rahman, J. Sanderson, E.P. Diamandis, M. Bajcsy, M. Yavuz, Electronic field effect detection of SARS-CoV-2 N-protein before the onset of symptoms, Biosens. Bioelectron., 2022, 210, 114331.

S5 Y. Wu, D. Ji, C. Dai, D. Kong, Y. Chen, L. Wang, M. Guo, Y. Liu, D. Wei, Triple-Probe DNA Framework-Based Transistor for SARS-CoV-2 10-in-1 Pooled Testing,

Nano Lett., 2022, 22, 3307–3316.

S6 J. Gao, C. Wang, C. Wang, Y. Chu, S. Wang, M. Sun, H. Ji, Y. Gao, Y. Wang, Y. Han, F. Song, H. Liu, Y. Zhang, L. Han, Poly-l-Lysine-Modified Graphene Field-Effect Transistor Biosensors for Ultrasensitive Breast Cancer miRNAs and SARS-CoV-2 RNA Detection, *Anal. Chem.*, 2022, 94, 1626–1636.

S7 X. Wang, D. Kong, M. Guo, L. Wang, C. Gu, C. Dai, Y. Wang, Q. Jiang, Z. Ai, C. Zhang, D. Qu, Y. Xie, Z. Zhu, Y. Liu, D. Wei, Rapid SARS-CoV-2 Nucleic Acid Testing and Pooled Assay by Tetrahedral DNA Nanostructure Transistor, *Nano Lett.* 2021, 21, 9450–9457.

S8 H. Jiang, Z. Sun, C. Zhang, X. Weng, 3D-architected aptasensor for ultrasensitive electrochemical detection of norovirus based on phosphorene-gold nanocomposites, *Sensor. Actuat. B-Chem*, 2022, 354, 131232.

S9 H. Zhao, W. Xie, R.-L. Zhang, X.-D. Wang, H.-F. Liu, J. Li, Tao Sha, X.-S. Guo, J. Li, Q.-M. Sun, Y.-P. Zhang, C.-P. Li, Electrochemical sensor for human norovirus based on covalent organic framework/pillararene heterosupramolecular nanocomposites, *Talanta*, 2022, 237, 122896.

S10 R. Chand, S. Neethirajan, Microfluidic platform integrated with graphene-gold nano-composite aptasensor for one-step detection of norovirus, *Biosens. Bioelectron.*, 2017, 98, 47-53.

S11 B. Kim, K.W. Chung, J.H. Lee, Non-stop aptasensor capable of rapidly monitoring norovirus in a sample, *J. Pharmaceut. Biomed.*, 2018, 152, 315-321.

S12

H. Liu, S. Ma, G. Ning, R. Zhang, H. Liang, F. Liu, L. Xiao, L. Guo, Y. Zhang, C.-S12 Li, H. Zhao, A “peptide-target-aptamer” electrochemical biosensor for norovirus detection using a black phosphorous nanosheet@Ti3C2-Mxene nanohybrid and magnetic covalent organic framework, *Talanta*, 2023, 258, 124433.

S13 F. Nasrin, I.M. Khoris, A.D. Chowdhury, J. Boonyakida, E.Y. Park, Impedimetric biosensor of Norovirus with low variance using simple bioconjugation on conductive polymer-Au nanocomposite, *Sensor. Actuat. B-Chem*, 2022, 369, 132390.

S14 S.H. Baeka, C.Y. Parka, T.P. Nguyenb, M.W. Kima, J.P. Parkc, C. Choid, S.Y. Kime, S.K. Kailasaf, T.J. Park, Novel peptides functionalized gold nanoparticles decorated tungsten disulfide nanoflowers as the electrochemical sensing platforms for the norovirus in an oyster, 2020, 114, 107225.
